# Supplementary material
Source: publisher figshare collection journal article supplement (https://frontiersin.figshare.com/ndownloader/files/34498508)
Supplement: Supplementary file 1 [file 34498508]

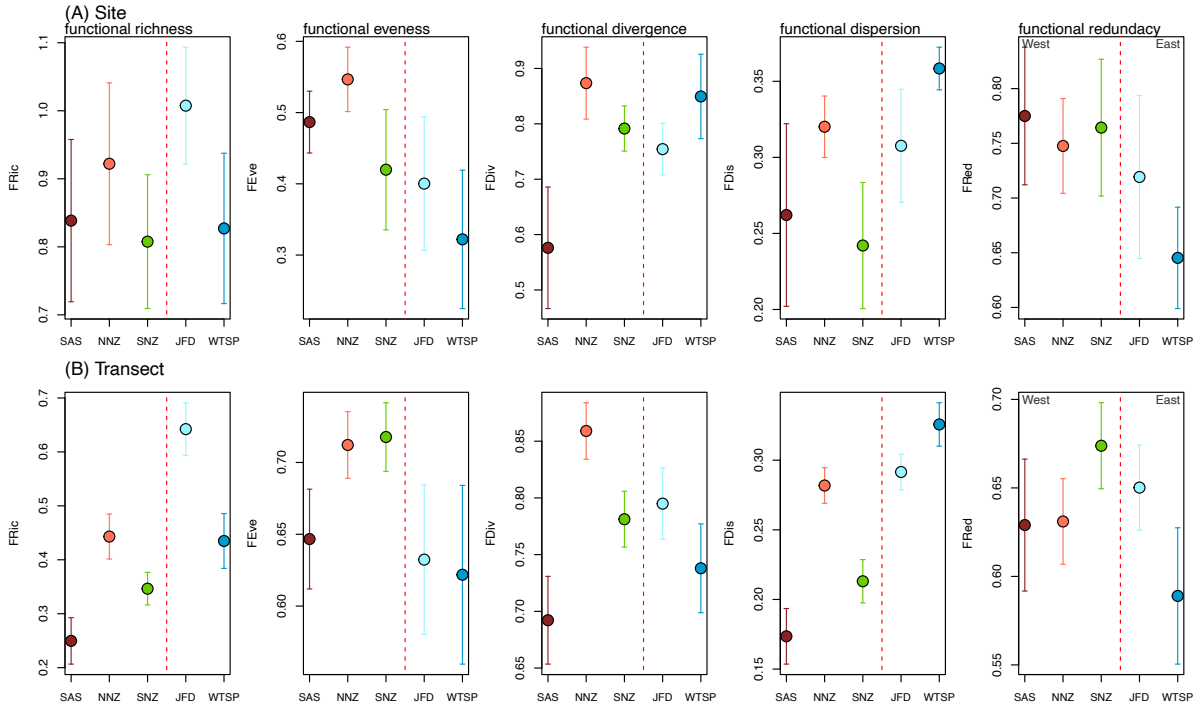

Figure S1. Functional diversity (richness, evenness, divergence, dispersion, redundancy) indices estimated for reef fishes at (A) site – level variation at all sampled provinces (B) transect – level variation including the sampled variation from all transects conducted at all provinces such as Southeast Australian Shelf (SAS), Northern New Zealand (NNZ), Southern New Zealand (SNZ), Juan Fernandez and Desventuradas (JFD), Warm Temperate Southeastern Pacific (WTSP). Patterns of variation presented is indicated by the boxplot depicting the median, first and third quartile and the upper and lower adjacent values. The upper and lower adjacent values in red represent the 95% confidence interval of a null model assuming a passive resampling from the overall pool of species
